# Supplementary material for: Effect of Protein Corona on The Transfection Efficiency of Lipid-Coated Graphene Oxide-Based Cell Transfection Reagents
Source: PubMed Central journal article supplement (PMC7076454; doi:10.3390/pharmaceutics12020113), 2020-01-30
Supplement: pharmaceutics-12-00113-s001.pdf [file pharmaceutics-12-00113-s001.pdf]

## Supplementary Materials: Effect of Protein Corona on The Transfection Efficiency of Lipid-Coated Graphene Oxide-Based Cell Transfection Reagents

Erica Quagliarini, Riccardo Di Santo, Sara Palchetti, Gianmarco Ferri, Francesco Cardarelli, Daniela Pozzi and Giulio Caracciolo

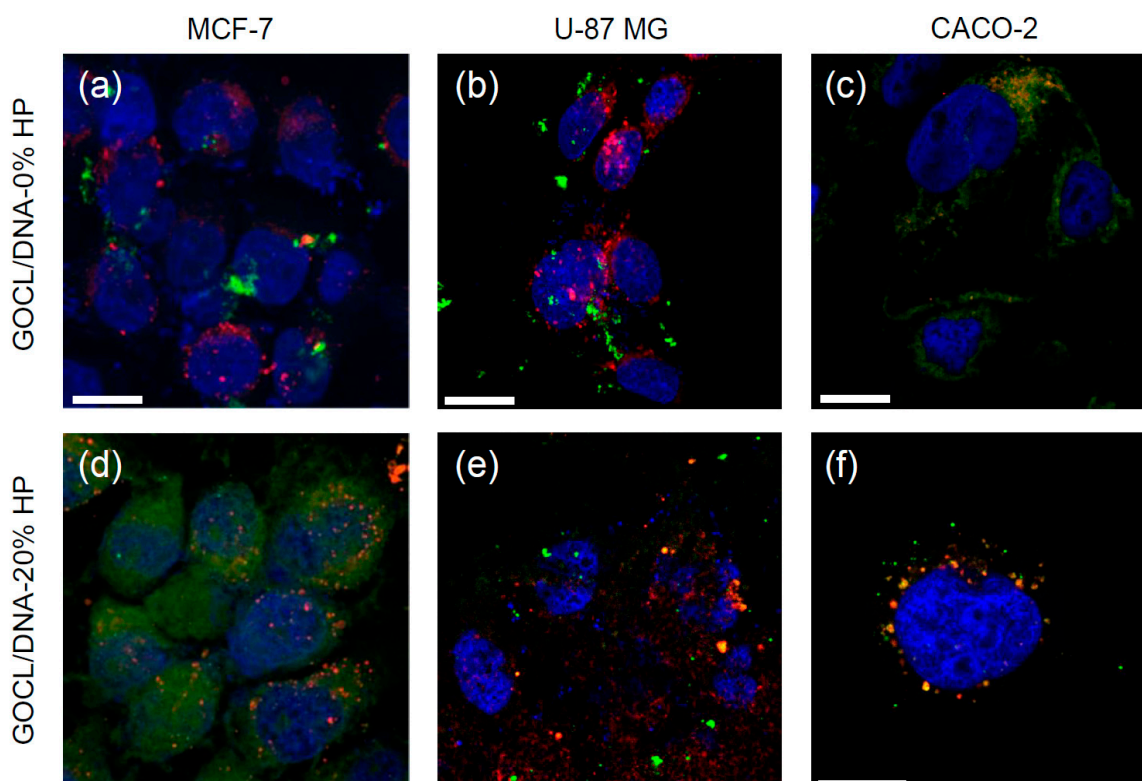

**Figure S1.** Merged confocal microscopy images of MCF-7, U-87 MG and CACO-2 cells treated with pristine grapholipoplexes (a, b and c, respectively) and grapholipoplex-protein complexes obtained by incubating pristine grapholipoplexes with human plasma (20%, vol/vol) (d, e and f, respectively). Grapholipoplexes were stained with Cy3-dye (green channel), lysosomes with lysotracker (red channel) and nuclei with DAPI (blue channel). Scale bars= 5 micron.
